# Supplementary material for: Construction of three-dimensional cobalt sulfide/multi-heteroatom co-doped porous carbon as an efficient trifunctional electrocatalyst
Source: Royal Society of Chemistry journal article supplement (doi:10.1039/d2nr01704k), 2022-01-01
Supplement: d2nr01704k1.pdf [file d2nr01704k1.pdf]

# Supporting Information

## **Construction of three-dimensional Cobalt Sulfide /Multi-Heteroatoms Co-doped Porous Carbon as Efficient Trifunctional Electrocatalyst**

*Jiakun Zhang, Bolan Cui, Shang Jiang, Haitao Liu, Meiling Dou\**

State Key Laboratory of Chemical Resource Engineering, Laboratory of  
Electrochemical Process and Technology for materials, Beijing University of  
Chemical Technology, Beijing 100029, China

Corresponding author: Prof. Meiling Dou, E-mail: [douml@mail.buct.edu.cn](mailto:douml@mail.buct.edu.cn)

---

## 1. Experimental Section

### 1.1. Materials Characterizations

Scanning electron microscopy (SEM) and high-resolution transmission electron microscopy (HR-TEM) characterizations were performed on FE-JSM-6701F (JEOL, Japan) and JSM-2100 (JEOL, Japan) microscopes, respectively. Power X-ray diffraction (XRD) patterns were profiled on an X-ray diffractometer (D/max-2500, Rigaku, Japan) (Cu  $K_{\alpha}$  radiation ( $\lambda=1.54056 \text{ \AA}$ ) as the X-ray source). Thermogravimetry (TG) measurements were conducted with a STA 7300 instrument to analyze the sulfidation process under high temperature. The specific surface area and pore size distribution were investigated by nitrogen adsorption-desorption measurements on a Quantachrome AUTOSORB-SI instrument. Raman spectra were obtained on a Horiba Jobin Yvon LabRam HR800 confocal microscope using 632.8 nm as laser. X-ray photoelectron spectroscopy (XPS) measurements were performed on the ESCALAB 250 spectrometer (Thermo Fisher) (using C 1s peak (284.98 eV) as reference for calibration).

### 1.2. Electrochemical Performance Test

For the electrochemical test, a conventional three-electrode system was employed on a CHI760e workstation (Shanghai Chenhua Instrument Corporation, China) using a graphite rod and a saturated calomel electrode (SCE) as the counter and reference electrode, respectively. The electrocatalyst coated rotating ring-disk electrode (RRDE) (area=0.19625 cm<sup>2</sup>, from Pine Instrument Company) was used as the working electrode. Typically, 5 mg of the as-prepared electrocatalyst was first added into 1 mL

---

of isopropanol and then mixed with 10  $\mu\text{L}$  of Nafion (5 wt.%, DuPont) solution by ultrasonically dispersing for 0.5 h. Afterwards, 20  $\mu\text{L}$  of the homogeneous slurry was uniformly dropped on to the RRDE with catalyst loading of 788  $\mu\text{g cm}^{-2}$ . For OER and HER measurements, 10  $\mu\text{L}$  of the above electrocatalyst ink was coated onto glassy carbon electrode (GCE) and dried naturally with the electrocatalyst loading of 394  $\mu\text{g cm}^{-2}$ . For comparison, the commercial Pt/C (20 wt.% of Pt, Johnson Matthey (JM)) and  $\text{RuO}_2$  working electrodes were also prepared by ultrasonically dispersing Pt/C or  $\text{RuO}_2$  into isopropanol solution containing Nafion (Pt loading: 78.8 and 394  $\mu\text{g cm}^{-2}$  for ORR and HER, respectively;  $\text{RuO}_2$  loading: 394  $\mu\text{g cm}^{-2}$ ). All potentials are given in reference to the reversible hydrogen electrode (RHE).

### **1.3. Rechargeable Zn-air Assembly and Performance Test**

The rechargeable Zn–air battery was assembled by using a Zn plate and a catalyst-loaded air electrode as the anode and cathode, respectively. 6.0 mol  $\text{L}^{-1}$  of KOH containing 0.2 mol  $\text{L}^{-1}$  of  $\text{Zn}(\text{Ac})_2$  was used as the electrolyte. For the preparation of working electrode, 2.25 mg of the as-prepared electrocatalyst was first added into 1 mL of isopropanol and then mixed with 10  $\mu\text{L}$  of Nafion (5 wt.%, DuPont) solution by ultrasonically dispersing for 0.5 h. For comparison, the commercial Pt/C and  $\text{IrO}_2$  electrodes were also prepared by ultrasonically dispersing Pt/C or  $\text{IrO}_2$  electrocatalysts into isopropanol solution containing Nafion. All of the homogeneous slurry was dropped on to the carbon fiber with electrocatalyst loading of 1 mg  $\text{cm}^{-2}$ . The effective area was controlled to be 1  $\text{cm}^2$  for both cathode and anode. All the electrochemical tests of Zn–air battery were conducted on the CHI760e electrochemical workstation.

---

The durability of the batteries was evaluated by galvanostatic discharge-charge cycling tests (600 s discharging, followed by 600 s charging in each cycle) at a current density of 10 mA cm<sup>-2</sup>.

#### 1.4. Overall Water Splitting Assembly and Performance Test

The overall water splitting performance was measured in a typical two-electrode system by the CHI 760e electrochemical workstation using the as-prepared electrocatalysts as both cathode and anode. 1 mg of the as-prepared electrocatalyst was first added into 1 mL of isopropanol and then mixed with 10  $\mu$ L of Nafion (5 wt.%, DuPont) solution by ultrasonically dispersing for 0.5 h. 1 mol L<sup>-1</sup> of KOH was used as the electrolyte. Cathode and anode were prepared by dispersing the catalysts ink onto carbon cloth (CC) with a loading of 1.0 mg cm<sup>-2</sup> and dried overnight. Polarization curves were tested in 1 M KOH with a scan rate of 5 mV s<sup>-1</sup> and the durability of the catalysts was also evaluated via chronopotentiometry test at a current density of 10 mA cm<sup>-2</sup> for 55000 s.

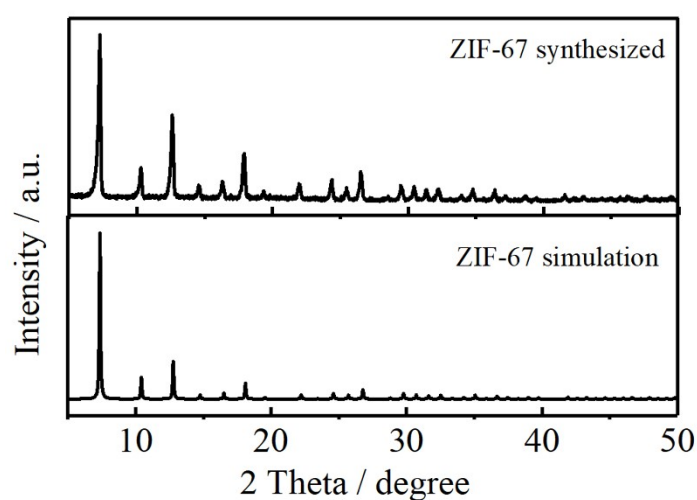

**Fig. S1.** XRD patterns of ZIF-67.

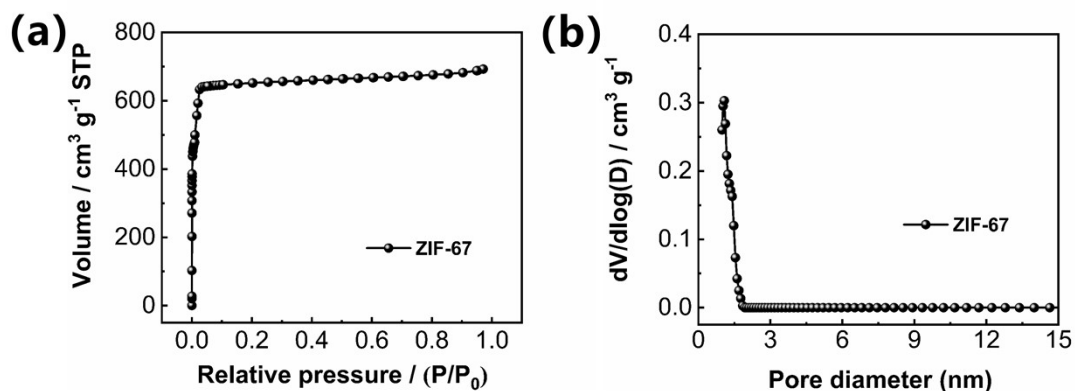

**Fig. S2.** (a) Nitrogen sorption isotherms and (b) pore size distribution of ZIF-67.

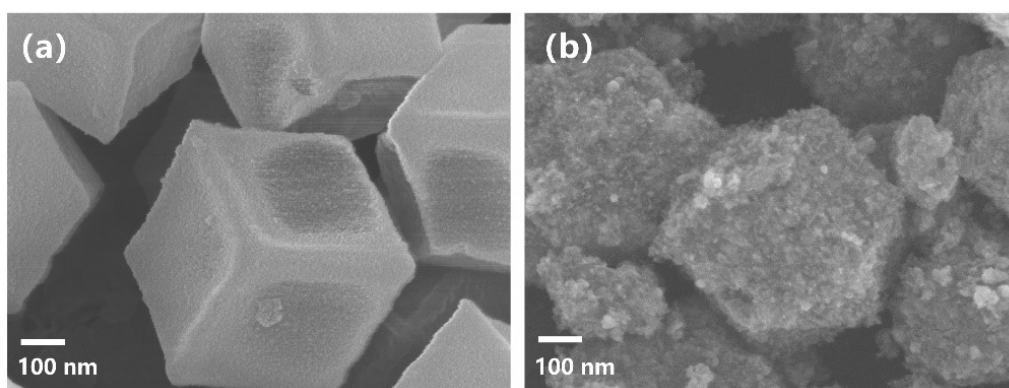

**Fig. S3.** Representative SEM images (a) of ZIF-67 and (b) Co<sub>9</sub>S<sub>8</sub>/CoNSC.

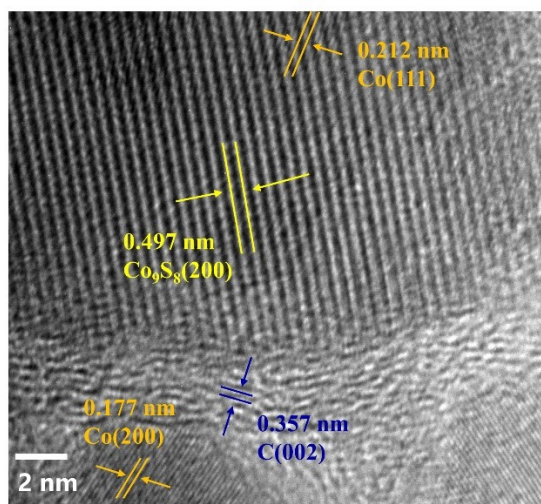

**Fig. S4.** HR-TEM images of Co<sub>9</sub>S<sub>8</sub>/CoNSC.

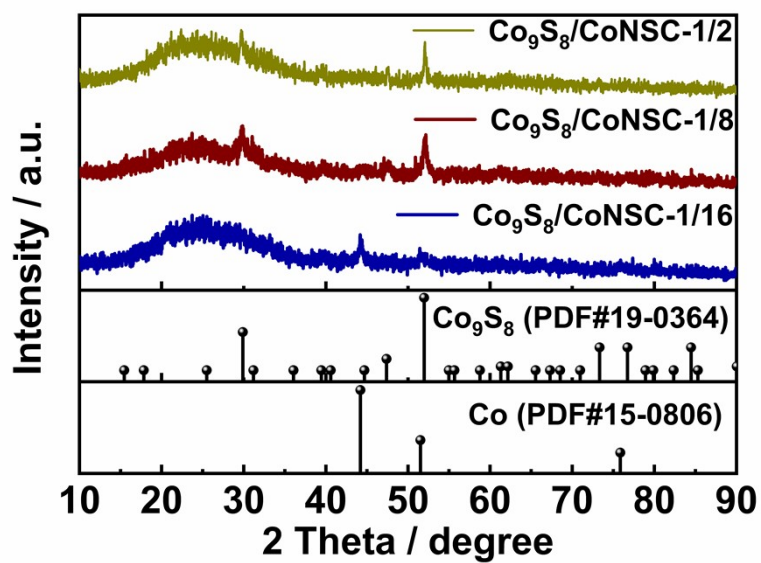

Fig. S5. XRD patterns of  $\text{Co}_9\text{S}_8/\text{CoNSC}$  prepared at different mass ratio of S/ZIF-67 (1/2, 1/8 and 1/16).

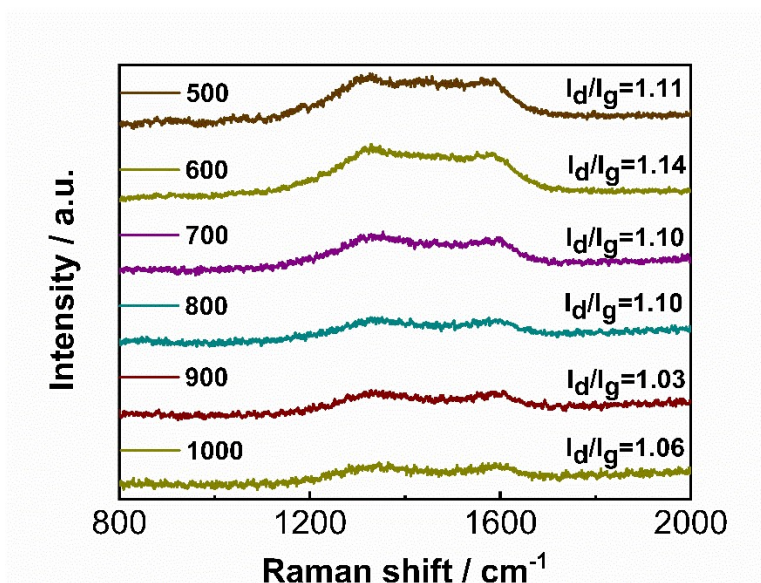

Fig. S6. Raman spectra of  $\text{Co}_9\text{S}_8/\text{CoNSC}$  prepared with different temperature.

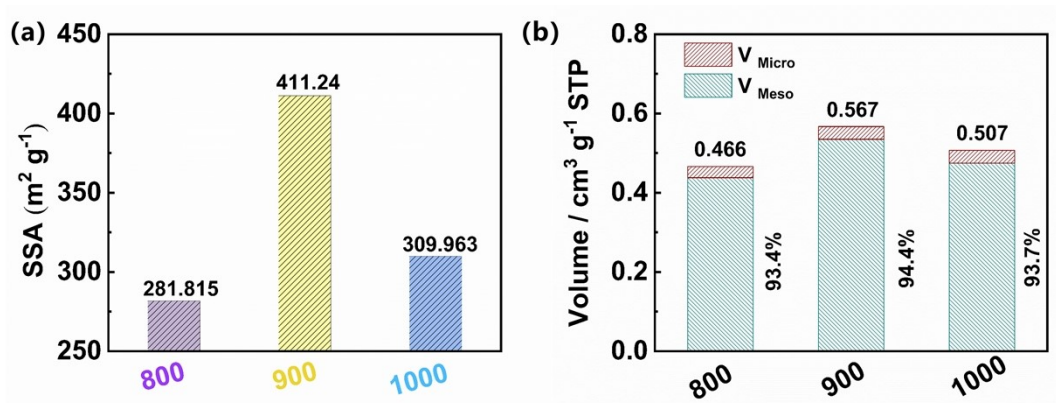

Fig. S7. Summary of (a) specific surface area and (b) pore volume of  $\text{Co}_9\text{S}_8/\text{CoNSC}$ .

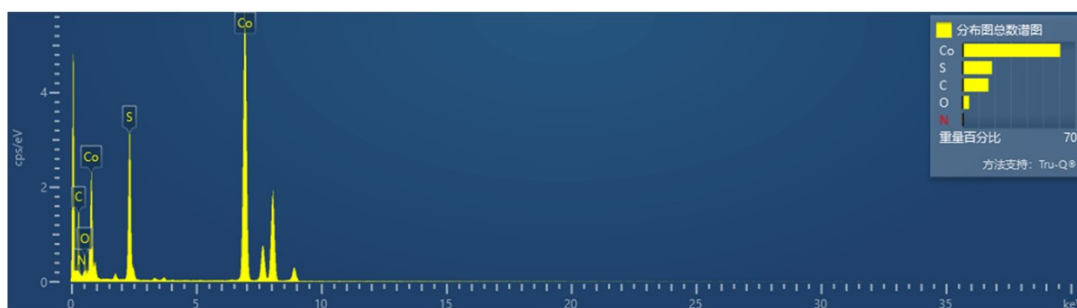

Fig. S8. EDX analysis of  $\text{Co}_9\text{S}_8/\text{CoNSC}$ .

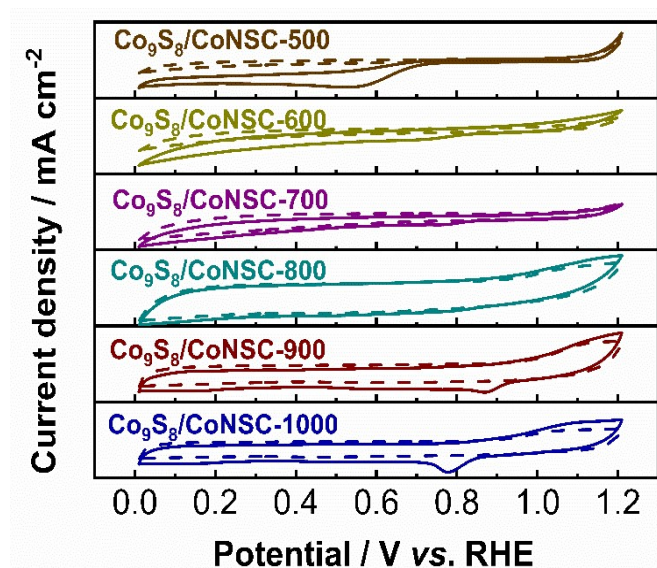

Fig. S9. CV curves of  $\text{Co}_9\text{S}_8/\text{CoNSC}$  in  $\text{N}_2$ - and  $\text{O}_2$ -saturated 0.1 M KOH.

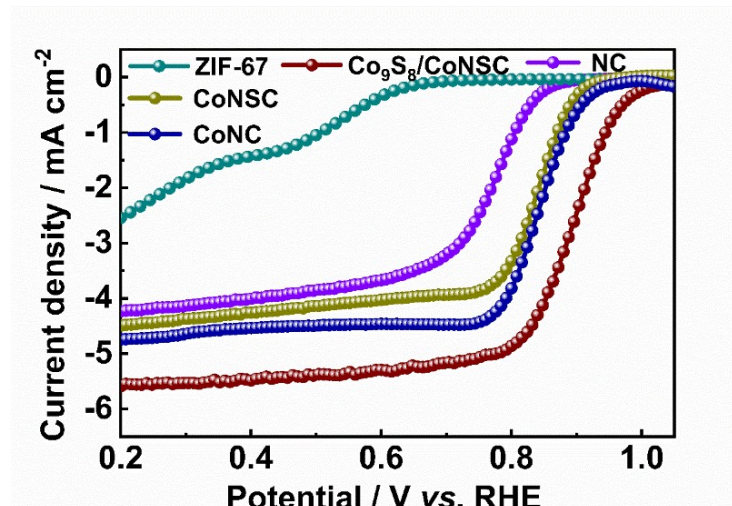

**Fig. S10.** LSV curves of ZIF-67, CoNSC, CoNC, NC and Co<sub>9</sub>S<sub>8</sub>/CoNSC in 0.1 M KOH at a scan rate of 5 mV s<sup>-1</sup>.

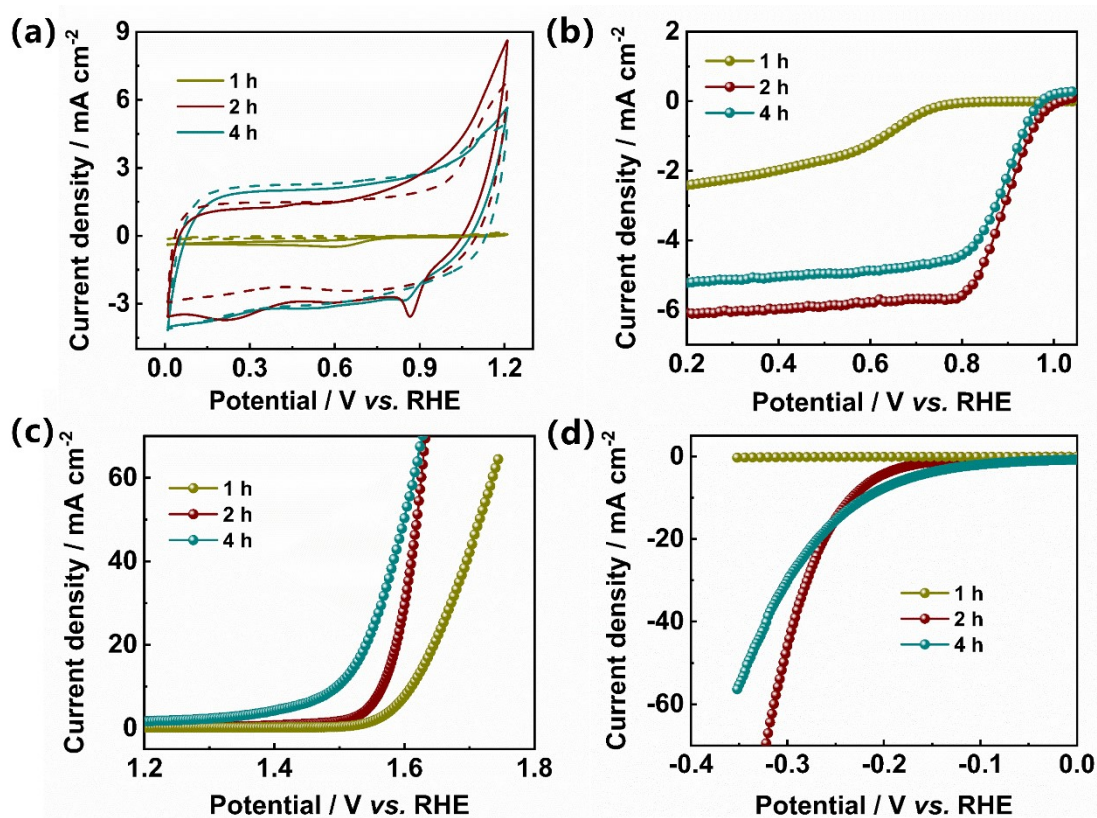

**Fig. S11.** (a) CV curves of the samples prepared at the sulfidation holding time of 1, 2 and 4 h (at 900 °C) in N<sub>2</sub> (dotted line) and O<sub>2</sub>-saturated (solid line) 0.1 M KOH. LSV curves of the samples prepared at holding time of 1, 2 and 4 h (b) toward ORR in 0.1 M KOH at a scan rate of 5 mV s<sup>-1</sup> in the range 0-1.2 V vs. RHE, (c) toward OER in 1 M KOH at a scan rate of 10 mV s<sup>-1</sup> in the range (0.947)-1.747 V vs. RHE and (d) toward



HER in the range (-0.353)-0.147 V vs. RHE.

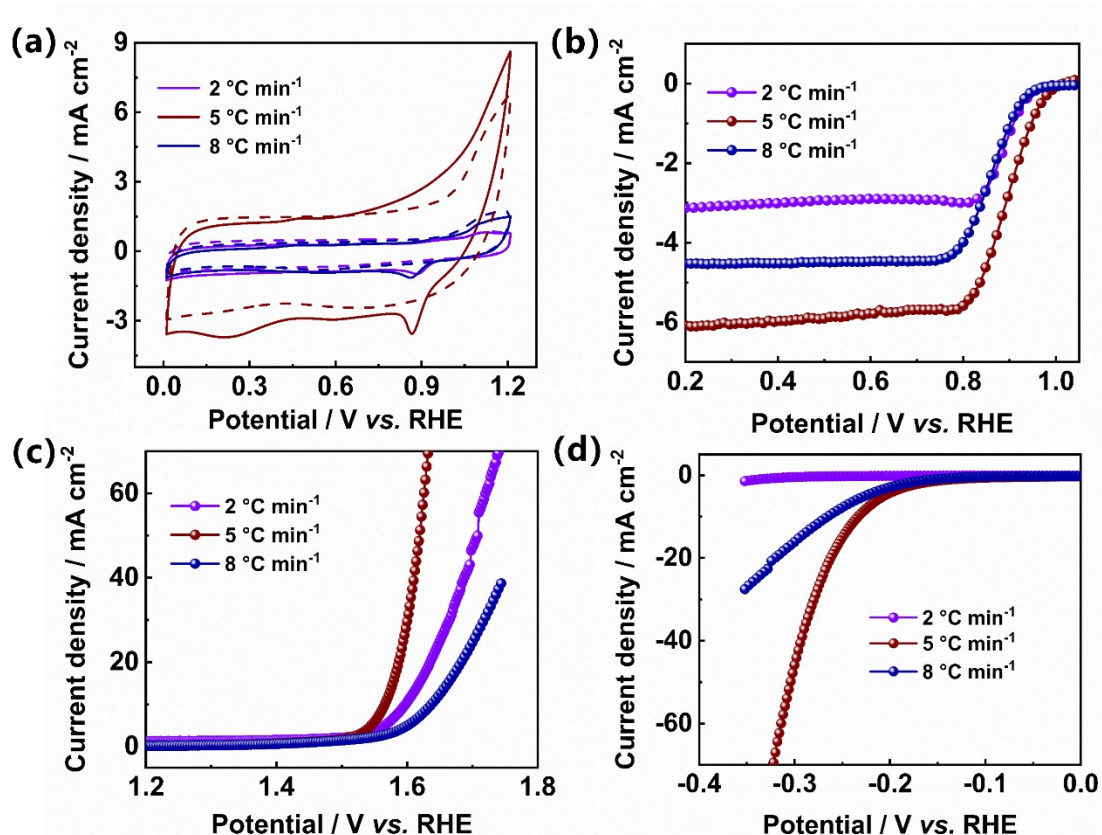

**Fig. S12.** (a) CV curves of the samples prepared at the sulfidation heating rate of 2, 5 and 8 °C min<sup>-1</sup> (at 900 °C) in N<sub>2</sub> (dotted line) and O<sub>2</sub>-saturated (solid line) 0.1 M KOH. LSV curves of the samples prepared at heating rate of 2, 5 and 8 °C min<sup>-1</sup> (b) toward ORR in 0.1 M KOH at a scan rate of 5 mV s<sup>-1</sup> in the range 0-1.2 V vs. RHE, (c) toward OER in 1 M KOH at a scan rate of 10 mV s<sup>-1</sup> in the range (0.947)-1.747 V vs. RHE and (d) toward HER in the range (-0.353)-0.147 V vs. RHE.

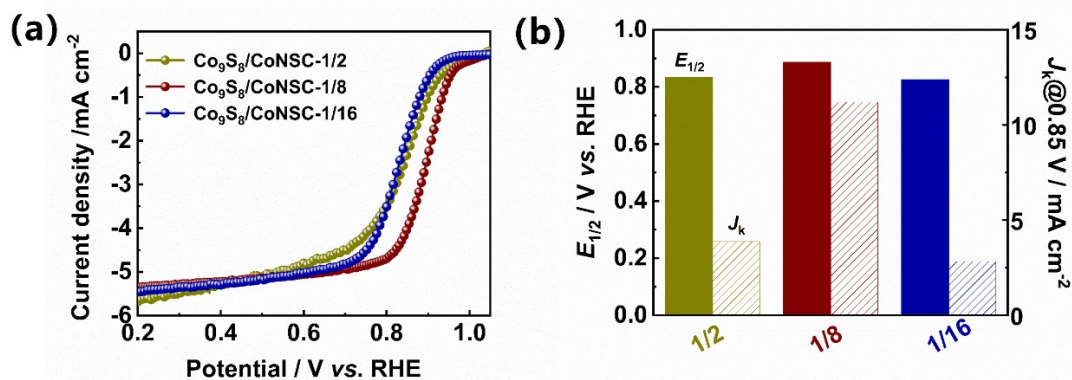

**Fig. S13.** (a) LSV curves of Co<sub>9</sub>S<sub>8</sub>/CoNSC prepared at different mass ratio of S/ZIF-67

(1/2, 1/8 and 1/16) in 0.1 M KOH at a scan rate of 5 mV s<sup>-1</sup> and (b) summary of  $E_{1/2}$  and  $J_k$  for the above electrocatalysts.

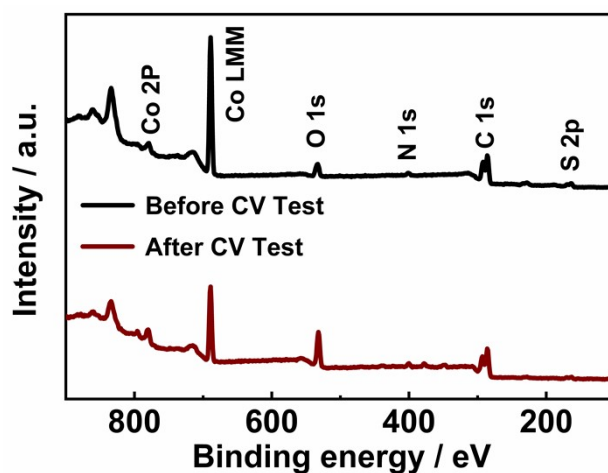

Fig. S14. XPS survey spectra of Co<sub>9</sub>S<sub>8</sub>/CoNSC before / after CV test toward ORR.

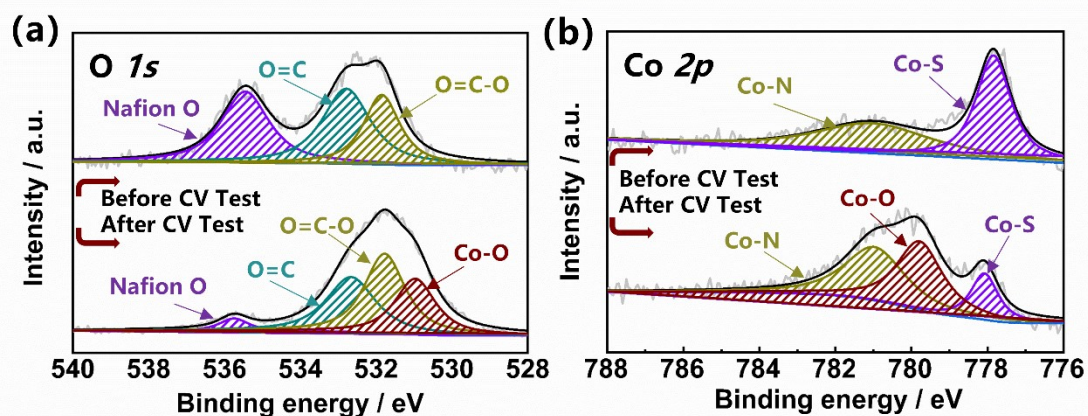

Fig. S15. (a) High-resolution XPS spectra of O 1s and (b) Co 2p of Co<sub>9</sub>S<sub>8</sub>/CoNSC before and after CV test toward ORR.

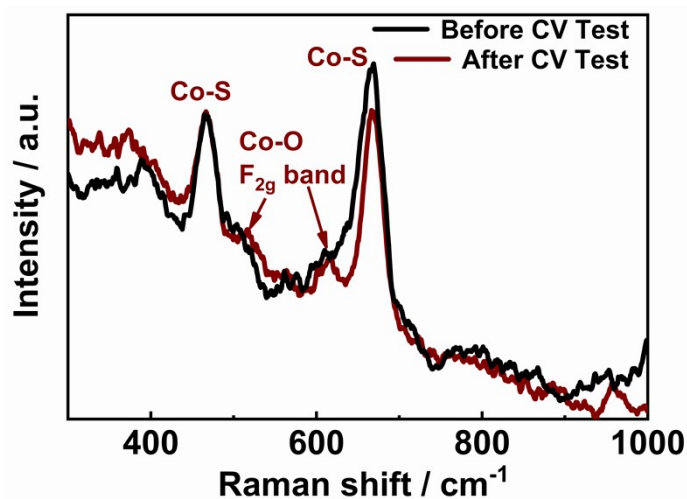

Fig. S16. Raman spectra of Co<sub>9</sub>S<sub>8</sub>/CoNSC before and after CV test towards ORR.

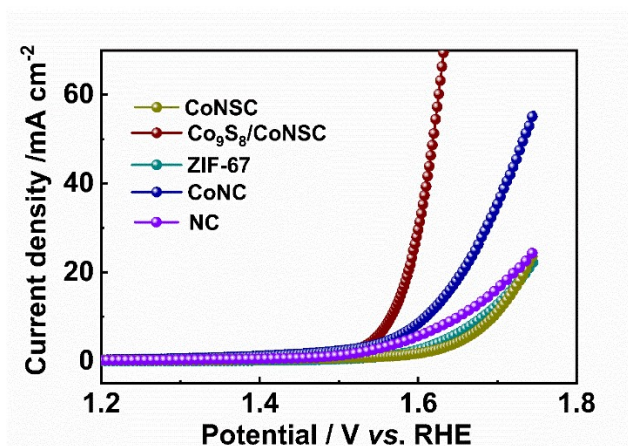

**Fig. S17.** LSV curves of ZIF-67, CoNSC, CoNC and Co<sub>9</sub>S<sub>8</sub>/CoNSC in 1 M KOH at a scan rate of 10 mV s<sup>-1</sup>.

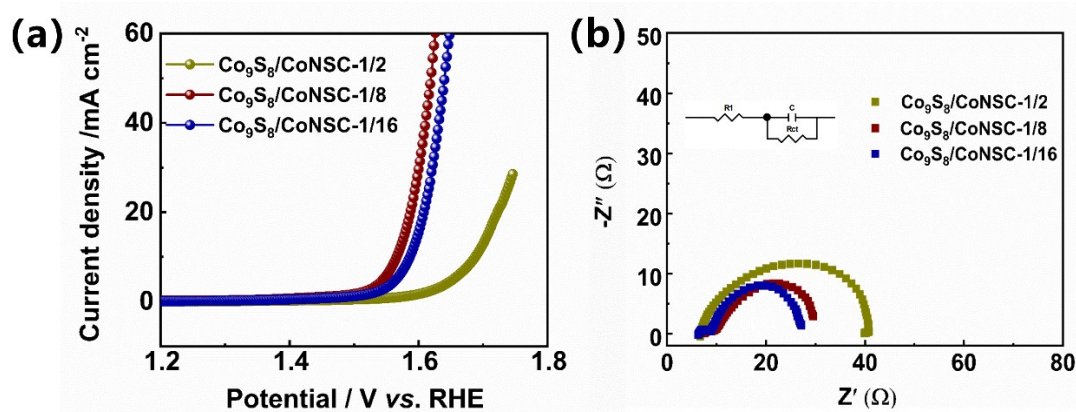

**Fig. S18.** (a) LSV curves of Co<sub>9</sub>S<sub>8</sub>/CoNSC prepared at different mass ratio of S/ZIF-67 (1/2, 1/8 and 1/16) in 1 M KOH at a scan rate of 10 mV s<sup>-1</sup> and (b) Nyquist plots for the above electrocatalysts.

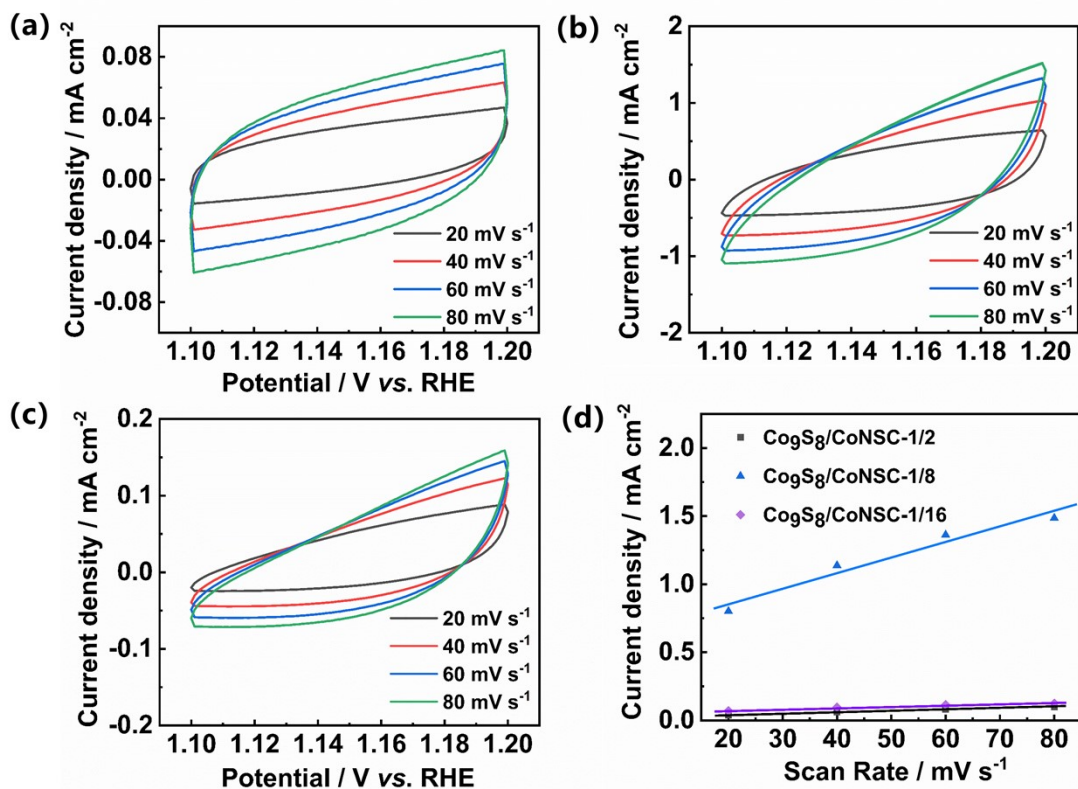

**Fig. S19.** CV curves of (a)  $\text{Co}_9\text{S}_8/\text{CoNSC}$ -1/2, (b)  $\text{Co}_9\text{S}_8/\text{CoNSC}$ -1/8, (c)  $\text{Co}_9\text{S}_8/\text{CoNSC}$ -1/16 in 1 M KOH electrolyte for OER during the potential range of 1.1-1.2 V vs. RHE and (d) relation of current density versus scan rate for  $\text{Co}_9\text{S}_8/\text{CoNSC}$  prepared at different mass ratio of ZIF-67/S.

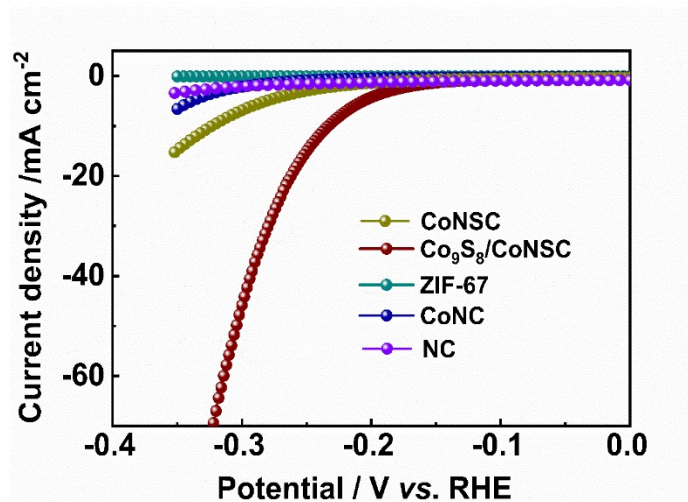

**Fig. S20.** LSV curves of ZIF-67, CoNSC, CoNC and  $\text{Co}_9\text{S}_8/\text{CoNSC}$  in 1 M KOH at a scan rate of 10  $\text{mV s}^{-1}$ .

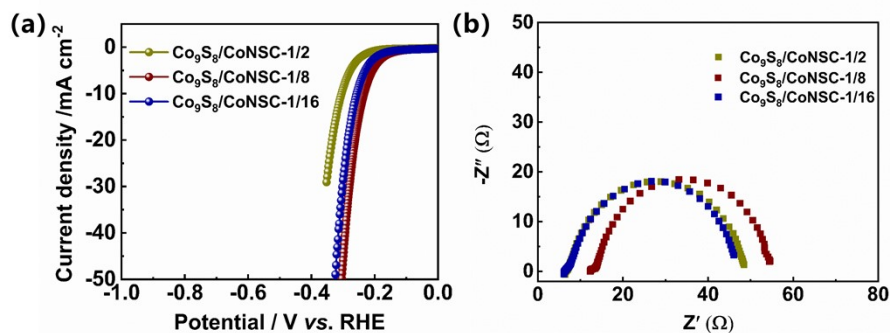

**Fig. S21.** (a) LSV curves of Co<sub>9</sub>S<sub>8</sub>/CoNSC prepared at different mass ratio of ZIF-67/S (2, 8 and 16) in 1 M KOH at a scan rate of 10 mV s<sup>-1</sup> and (b) Nyquist plots o for the above electrocatalysts.

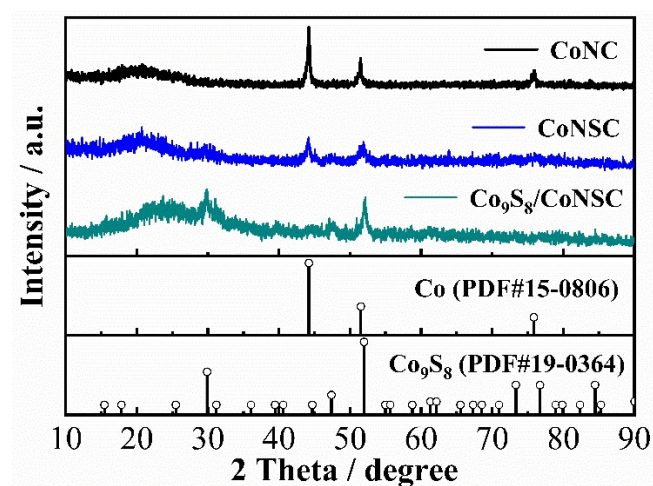

**Fig. S22.** XRD patterns of CoNC, CoNSC and Co<sub>9</sub>S<sub>8</sub>/CoNSC

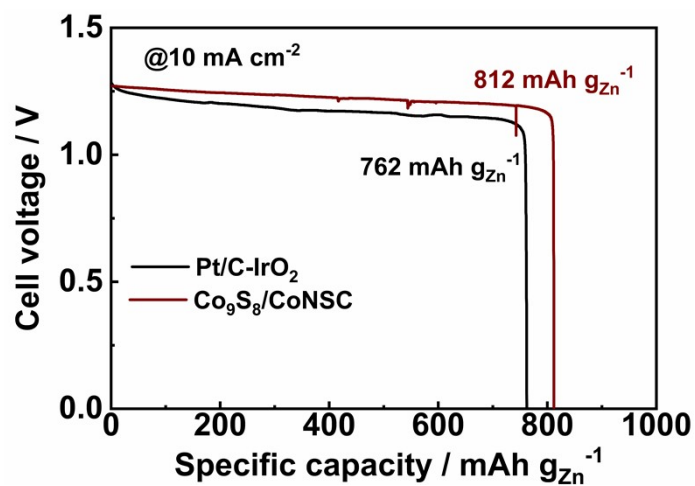

**Fig. S23.** Discharge curves of Zn–air batteries based on the Co<sub>9</sub>S<sub>8</sub>/CoNSC and Pt/C-IrO<sub>2</sub> electrodes at 10 mA cm<sup>-2</sup>.

**Table S1.** Element composition and content for Co<sub>9</sub>S<sub>8</sub>/CoNSC based on XPS analysis.

| Sample                                     | Co (%) | S (%) | N (%) | C (%) | O (%) |
|--------------------------------------------|--------|-------|-------|-------|-------|
| Co <sub>9</sub> S <sub>8</sub> /CoNSC-500  | 8.56   | 11.49 | 15.38 | 48.32 | 16.26 |
| Co <sub>9</sub> S <sub>8</sub> /CoNSC-600  | 8.76   | 9.66  | 13.8  | 51.57 | 16.2  |
| Co <sub>9</sub> S <sub>8</sub> /CoNSC-700  | 9.23   | 12.12 | 9.24  | 48.76 | 20.65 |
| Co <sub>9</sub> S <sub>8</sub> /CoNSC-800  | 9.07   | 13.05 | 6.71  | 61.58 | 9.6   |
| Co <sub>9</sub> S <sub>8</sub> /CoNSC-900  | 10.43  | 15.37 | 4.84  | 62.4  | 6.96  |
| Co <sub>9</sub> S <sub>8</sub> /CoNSC-1000 | 7.78   | 12.03 | 3.35  | 70.71 | 6.13  |

**Table S2.** Summary of ORR performance of Co<sub>x</sub>S-based materials in 0.1 M KOH.

| Materials                                              | <i>E</i> <sub>onset</sub><br>(V vs. RHE) | <i>E</i> <sub>1/2</sub><br>(V vs. RHE) | Loading<br>(mg cm <sup>-2</sup> ) | Reference        |
|--------------------------------------------------------|------------------------------------------|----------------------------------------|-----------------------------------|------------------|
| Co <sub>9</sub> S <sub>8</sub> @NSCM                   | 0.97                                     | 0.81                                   | 0.15                              | 1                |
| Co <sub>9</sub> S <sub>8</sub> @NC                     | 0.92                                     | 0.861                                  | 0.248                             | 2                |
| Co <sub>9</sub> S <sub>8</sub> /CD@NSC                 | /                                        | 0.84                                   | 0.255                             | 3                |
| Ni <sub>3</sub> Fe–Co <sub>9</sub> S <sub>8</sub> /rGO | 0.91                                     | 0.80                                   | 0.25                              | 4                |
| CoS <sub>2</sub> /Cu <sub>2</sub> S-NF                 | /                                        | 0.80                                   | 0.265                             | 5                |
| <b>Co<sub>9</sub>S<sub>8</sub>/CoNSC</b>               | <b>0.983</b>                             | <b>0.889</b>                           | <b>0.788</b>                      | <b>This work</b> |

**Table S3.** XPS results for the Co<sub>9</sub>S<sub>8</sub>/CoNSC sample before and after CV test.

| Element     | Co (at. %) | S (at. %) | N (at. %) | C (at. %) | O (at. %) |
|-------------|------------|-----------|-----------|-----------|-----------|
| Before test | 1.89       | 6.19      | 4.35      | 77.24     | 10.33     |
| After test  | 2.11       | 2.76      | 3.65      | 70.42     | 21.06     |

**Table S4.** Summary of previously reported non-precious metal electrocatalysts for OER in 1.0 M KOH.

| Materials                                                                             | Overpotential<br>@ $J_{10}/\text{mV}$ | Loading<br>( $\text{mg cm}^{-2}$ ) | Reference        |
|---------------------------------------------------------------------------------------|---------------------------------------|------------------------------------|------------------|
| $\text{Co}_9\text{S}_8@\text{MoS}_2$                                                  | 340                                   | 0.40                               | 6                |
| $\text{Co}_9\text{S}_8@\text{TDC}$                                                    | 330                                   | 1.4                                | 7                |
| $\text{Co}_9\text{S}_8/\text{NSCP}$                                                   | 370                                   | 0.331                              | 8                |
| $\text{CeO}_x/\text{CoS}$                                                             | 269                                   | 0.2                                | 9                |
| $\text{Co}_x\text{S}_y@\text{C}$                                                      | 470                                   | 0.141                              | 10               |
| $\text{Co}_9\text{S}_8@\text{SNC}$                                                    | 320                                   | 0.22                               | 11               |
| $\text{Co}_9\text{S}_8@\text{NOSC}$                                                   | 340                                   | 0.28                               | 12               |
| $\text{Ni}_3\text{S}_2$ nanosheet                                                     | 260                                   | 4.1                                | 13               |
| $\text{Ni}_2\text{P}$                                                                 | 290                                   | 0.25                               | 14               |
| $\text{CoMnP}$                                                                        | 330                                   | 0.285                              | 15               |
| $\text{NiCo-LDH}$                                                                     | 335                                   | 1                                  | 16               |
| $\text{Co}_4\text{N}$                                                                 | 330                                   | 0.83                               | 17               |
| <b><math>\text{Co}_9\text{S}_8/\text{CoNSC-900-4 h}</math></b>                        | <b>266</b>                            | <b>0.394</b>                       | <b>This work</b> |
| <b><math>\text{Co}_9\text{S}_8/\text{CoNSC-900-2 h}</math></b>                        | <b>326</b>                            | <b>0.394</b>                       | <b>This work</b> |
| <b><math>\text{Co}_9\text{S}_8/\text{CoNSC-900-1 h}</math></b>                        | <b>368</b>                            | <b>0.394</b>                       | <b>This work</b> |
| <b><math>\text{Co}_9\text{S}_8/\text{CoNSC-900-2 } ^\circ\text{C min}^{-1}</math></b> | <b>370</b>                            | <b>0.394</b>                       | <b>This work</b> |
| <b><math>\text{Co}_9\text{S}_8/\text{CoNSC-900-8 } ^\circ\text{C min}^{-1}</math></b> | <b>407</b>                            | <b>0.394</b>                       | <b>This work</b> |

**Table S5.** Summary of TMCs-based electrocatalysts for HER in 1.0 M KOH.

| <b>Materials</b>                                                   | <b>Overpotential<br/>@ <math>j_{10}</math> / mV</b> | <b>Tafel slope<br/>(mV dec<sup>-1</sup>)</b> | <b>Reference</b> |
|--------------------------------------------------------------------|-----------------------------------------------------|----------------------------------------------|------------------|
| MoS <sub>2</sub> @CoS <sub>2</sub>                                 | 96                                                  | 60                                           | 18               |
| Co <sub>9</sub> S <sub>8</sub> -NDCL                               | 146                                                 | 70                                           | 19               |
| Co <sub>9</sub> S <sub>8</sub> HNSs                                | 267                                                 | 139                                          | 20               |
| Co <sub>9</sub> S <sub>8</sub> nanotubes                           | 280                                                 | 135                                          | 21               |
| Co <sub>9</sub> S <sub>8</sub> -Ni <sub>3</sub> S <sub>2</sub> /NF | 277                                                 | 171                                          | 22               |
| <b>Co<sub>9</sub>S<sub>8</sub>/CoNSC</b>                           | <b>233</b>                                          | <b>93.78</b>                                 | <b>This work</b> |

**Table S6.** Summary of performance for Zn-air battery.

| <b>Materials</b>                                   | <b>Power<br/>density<br/>(mW cm<sup>-2</sup>)</b> | <b>Specific<br/>Capacity<br/>(mA h g<sub>Zn</sub><sup>-1</sup>)</b> | <b>Energy<br/>density<br/>(Wh kg<sub>Zn</sub><sup>-1</sup>)</b> | <b>Cycling<br/>stability<br/>(h)</b> | <b>Reference</b> |
|----------------------------------------------------|---------------------------------------------------|---------------------------------------------------------------------|-----------------------------------------------------------------|--------------------------------------|------------------|
| NPS-G                                              | 151                                               | 686                                                                 | 805                                                             | 20                                   | 23               |
| CoO/N-CNT                                          | 265                                               | 570                                                                 | 700                                                             | 22                                   | 24               |
| Co <sub>1-x</sub> S/Co <sub>9</sub> S <sub>8</sub> | 168.2                                             | 817.9                                                               | 973.3                                                           | 78                                   | 25               |
| Co/NGC-3                                           | 134.4                                             | 716                                                                 | 847.4                                                           | 120                                  | 26               |
| Co/Co <sub>9</sub> S <sub>8</sub> -NCL             | 112                                               | 799                                                                 | /                                                               | 25                                   | 27               |
| <b>Co<sub>9</sub>S<sub>8</sub>/CoNSC</b>           | <b>150</b>                                        | <b>812</b>                                                          | <b>939.5</b>                                                    | <b>40</b>                            | <b>This work</b> |

**Table S7.** Summary of performance for overall water splitting in 1.0 M KOH.

| <b>Materials</b>                                                 | <b>Overpotential @ 10<br/>mA cm<sup>-2</sup></b> | <b>Cycling<br/>Stability (h)</b> | <b>Reference</b> |
|------------------------------------------------------------------|--------------------------------------------------|----------------------------------|------------------|
| Co <sub>9</sub> S <sub>8</sub> -NSC@Mo <sub>2</sub> C            | 1.61 V                                           | 20                               | 28               |
| Co <sub>9</sub> S <sub>8</sub> @MoS <sub>2</sub>                 | 1.67 V                                           | 16                               | 29               |
| Co <sub>9</sub> S <sub>8</sub> -V <sub>3</sub> S <sub>4</sub>    | 1.53 V                                           | 48                               | 30               |
| MoS <sub>2</sub> /NiS <sub>2</sub>                               | 1.63V                                            | 24                               | 31               |
| Co <sub>9</sub> S <sub>8</sub> @NiCo <sub>2</sub> O <sub>4</sub> | 1.55 V                                           | 50                               | 32               |



## REFERENCES

- 1 Y. Li, W. Zhou, J. Dong, Y. Luo, P. An, J. Liu, X. Wu, G. Xu, H. Zhang and J. Zhang, *Nanoscale*, 2018, **10**, 2649-2657.
- 2 F. Bai, X. Qu, J. Wang, X. Chen and W. Yang, *ACS Appl. Mater. Interfaces*, 2020, **12**, 33740-33750.
- 3 P. Zhang, D. Bin, J. S. Wei, X. Q. Niu, X. B. Chen, Y. Y. Xia and H. M. Xiong, *ACS Appl. Mater. Interfaces*, 2019, **11**, 14085-14094.
- 4 X. Hu, T. Huang, Y. Tang, G. Fu and J. M. Lee, *ACS Appl. Mater. Interfaces*, 2019, **11**, 4028-4036.
- 5 Y. Z. Chen, C. Wang, Z. Y. Wu, Y. Xiong, Q. Xu, S. H. Yu and H. L. Jiang, *Adv. Funct. Mater.*, 2015, **27**, 5010-5016.
- 6 J. Li, G. Li, J. Wang, C. Xue, X. Li, S. Wang, B. Han, M. Yang and L. Li, *Inorg. Chem. Front.*, 2020, **7**, 191-197.
- 7 J.-Y. Zhao, R. Wang, S. Wang, Y.-R. Lv, H. Xu and S.-Q. Zang, *J. Mater. Chem. A*, 2019, **7**, 7389-7395.
- 8 X. Gao, Z. Xu and G. Li, *Chem. Eng. J.*, 2022, **431**, 133385.
- 9 N. Huang, S. Yan, L. Yang, M. Zhang, P. Sun, X. Lv and X. Sun, *J. Solid State Chem.*, 2020, **285**, 121185.
- 10 B. Chen, R. Li, G. Ma, X. Gou, Y. Zhu and Y. Xia, *Nanoscale*, 2015, **7**, 20674-20684.
- 11 F. Xu, J. Zhao, J. Wang, T. Guan and K. Li, *J. Colloid Interface Sci.*, 2022, **608**, 2623-2632.
- 12 S. Huang, Y. Meng, S. He, A. Goswami, Q. Wu, J. Li, S. Tong, T. Asefa and M. Wu, *Adv. Funct. Mater.*, 2017, **27**, 1606585.
- 13 X. Xu, F. Song and X. Hu, *Nat. Commun.*, 2016, **7**, 12324.
- 14 M. Liu and J. Li, *ACS Appl. Mater. Interfaces*, 2016, **8**, 2158-2165.
- 15 P. Chen, K. Xu, Z. Fang, Y. Tong, J. Wu, X. Lu, X. Peng, H. Ding, C. Wu and Y. Xie, *Angew. Chem., Int. Ed.*, 2015, **54**, 14710-14714.
- 16 J. S. Chen, J. Ren, M. Shalom, T. Fellingner and M. Antonietti, *ACS Appl. Mater. Interfaces*, 2016, **8**, 5509-5516.
- 17 T. Liu, Y. Liang, Q. Liu, X. Sun, Y. He and A. M. Asiri, *Electrochem. Commun.*, 2015, **60**, 92-96.
- 18 S. He, H. Du, K. Wang, Q. Liu, J. Sun, Y. Liu, Z. Du, L. Xie, W. Ai and W. Huang, *Chem. Commun*, 2020, **56**, 5548-5551.
- 19 J. Mujtaba, L. He, H. Zhu, Z. Xiao, G. Huang, A. A. Solovev and Y. Mei, *ACS Appl. Nano Mater.*, 2021, **4**, 1776-1785.
- 20 X. Ma, W. Zhang, Y. Deng, C. Zhong, W. Hu and X. Han, *Nanoscale*, 2018, **10**, 4816-4824.
- 21 L. Jin, C. Lv, J. Wang, H. Xia, Y. Zhao and Z. Huang, *J. Anal. Chem.*, 2016, **7**, 210-218.
- 22 R. Illathvalappil, P. S. Walko, F. Kanheerampockil, S. K. Bhat, R. N. Devi and S. Kurungot, *Chem. Eur. J.*, 2020, **26**, 7900-7911.

- 
- 23 X. Zheng, J. Wu, X. Cao, J. Abbott, C. Jin, H. Wang, P. Strasser, R. Yang, X. Chen and G. Wu, *Appl. Catal. B-Environ.*, 2019, **241**, 442-451.
- 24 Y. G. Li, M. Gong, Y. Liang, J. Feng, J. E. Kim, H. Wang and H. J. Dai, *Nat. Commun.*, 2013, **4**, 1805.
- 25 B. N. Wang, D. Chen, H. Z. Dong, Y. Huang, L. Sui, B. L. Pang and L. F. Dong, *Electrochim. Acta*, 2021, **388**, 138594.
- 26 J. M. Li, Y. M. Kang, D. Liu, Z. Q. Lei and P. Liu. *ACS Appl. Mater. Interfaces*, 2020, **12**, 5717-5729.
- 27 N.-F. Yu, C. Wu, W. Huang, Y.-H. Chen, D.-Q. Ruan, K.-L. Bao, H. Chen, Y. Zhang, Y. Zhu, Q.-H. Huang, W.-H. Lai, Y.-X. Wang, H.-G. Liao, S.-G. Sun, Y.-P. Wu and J. Wang, *Nano Energy*, 2020, **77**.
- 28 X. H. Luo, Q. L. Zhou, S. Du, J. W. Zhong, X. L. Deng and Y. L. Liu, *ACS Appl. Mater. Interfaces*, 2018, **10**, 22291-22302.
- 29 J. M. Bai, T. Meng, D. L. Guo, S. G. Wang, B. G. Mao and M. H. Cao, *ACS Appl. Mater. Interfaces*, 2018, **2**, 1678-1689.
- 30 X. Dong, Y. Q. Jiao, G. C. Yang, H. J. Yan, A. Wu, D. Z. Guo, Y. Wang, C. G. Tian and H. G. Fu, *Sci China Mater*, 2021, **64**, 1396-1407.
- 31 J. Xu, J. Rong, Y. Zheng, Y. Zhu, K. Mao, Z. Jing, T. Zhang, D. Yang and F. Qiu, *Electrochim. Acta*, 2021, **385**, 138438.
- 32 X. Q. Du, C. Y. Zhang, H. B. Wang, Y. H. Wang and X. S. Zhang. *J. Alloys Compd.*, 2021, **885**, 160972.
